# Supplementary material
Source: publisher figshare collection journal article supplement (https://acs.figshare.com/ndownloader/files/4256281)
Supplement: Supplementary file 1 [file 4256281]

# Supporting Information

for

## Lamellar Micelles as Templates for the Preparation of Silica Nanodisks

*Subhasree Banerjee, Harekrishna Ghosh, Anindya Datta*

Department of Chemistry, Indian Institute of Technology Bombay,

Powai, Mumbai 400 076, India

Phone: +91 22 2576 7149, Fax: +91 22 2570 3480

e-mail: anindya@chem.iitb.ac.in

**RECEIVED DATE** (to be automatically inserted after your manuscript is accepted if required according to the journal that you are submitting your paper to)

TITLE RUNNING HEAD: Origin of Silica Nanodisks

*CORRESPONDING AUTHOR FOOTNOTE: Phone: +91 22 2576 7149, Fax: +91 22 2570 3480, email: anindya@chem.iitb.ac.in*

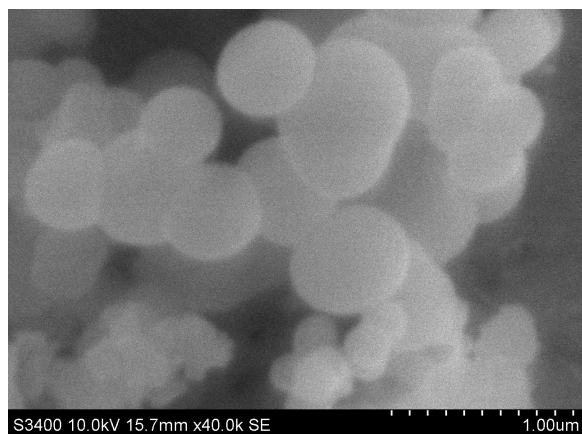

(A)

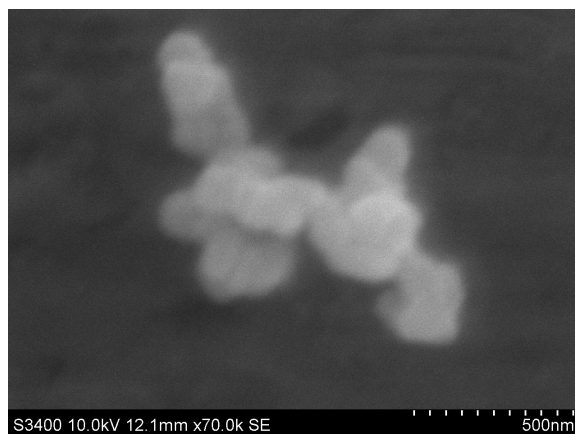

(B)

**Figure S1.** Scanning electron micrographs (SEM) of silica nanostructures prepared in the AOT microemulsion in  $w_0=22$  in presence of 17M  $\text{FeCl}_3$ . Here image of the product obtained from the upper layer is shown in the panel (A), product from the interface shown in panel (B).

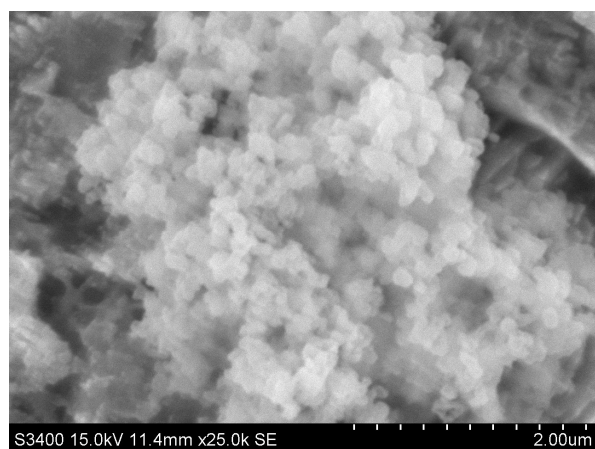

(A)

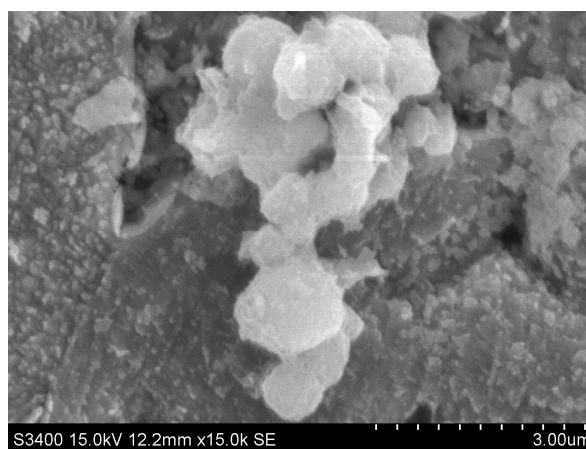

(B)

**Figure S2.** Scanning electron micrographs (SEM) of silica nanostructures prepared in the AOT microemulsion in  $w_0=100$  in absence of  $\text{FeCl}_3$ . Here image of the product obtained from the upper layer is shown in the panel (A), product from the interface shown in panel (B).

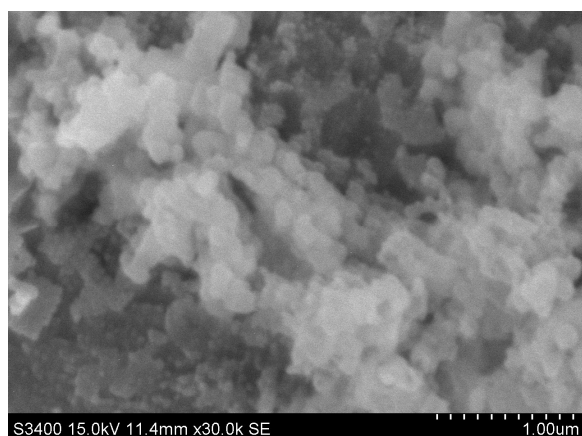

(A)

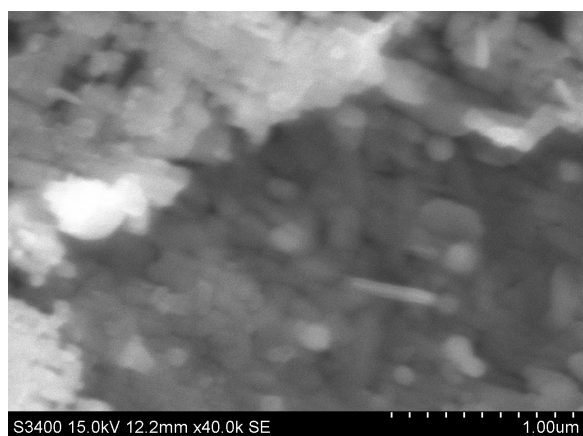

(B)

**Figure S3.** Scanning electron micrographs (SEM) of silica nanostructures prepared in the AOT microemulsion in  $w_0=200$  in absence of  $\text{FeCl}_3$ . Here image of the product obtained from the upper layer is shown in the panel (A), product from the interface shown in panel (B).

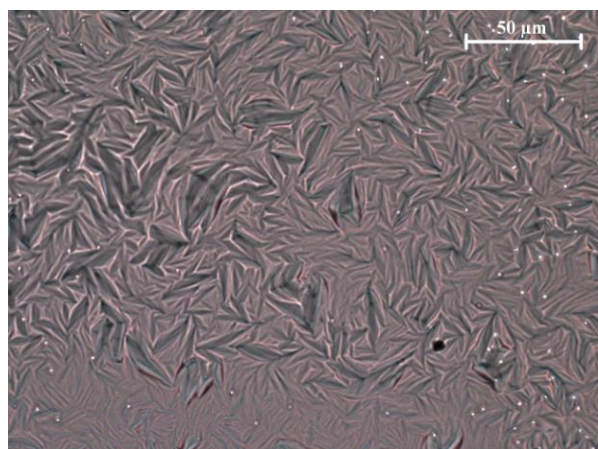

(A)

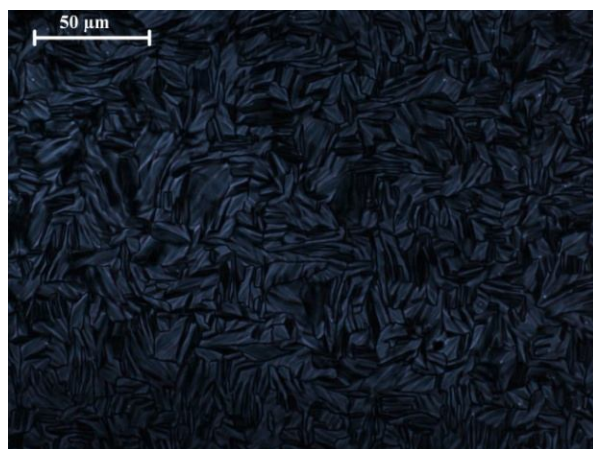

(B)

**Figure S4.** Crossed polarized optical micrographs (POM) a portion of aqueous solution 60 wt% ( $w_0 = 41$ ). AOT; (A) when polarizers are at  $0^\circ$  and (B) when polarized are cross at  $90^\circ$ .

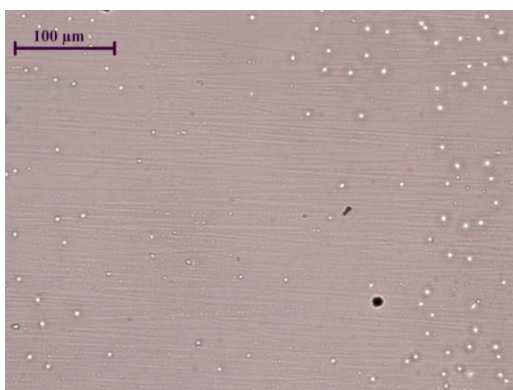

(A)

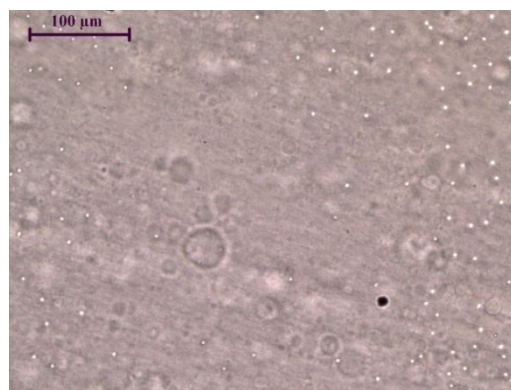

(B)

**Figure S5.** Polarized optical micrographs (POM) of (A) upper layer of microemulsion at  $w_0=200$ ; (B) an aqueous solution of AOT containing 5wt% ( $w_0=494$ ) AOT.

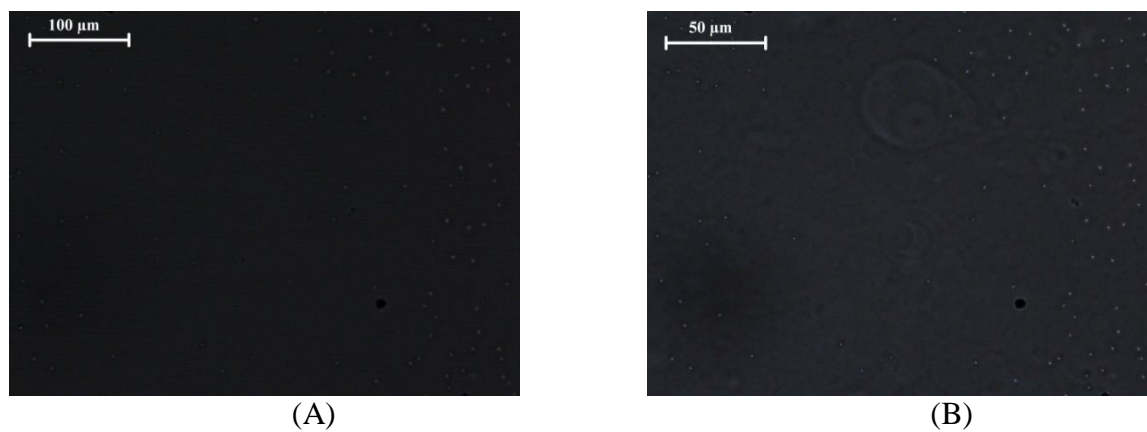

**Figure S6.** Crossed polarized optical micrographs (POM) of (A) upper layer of microemulsion at  $w_0=200$ ; (B) an aqueous solution of AOT containing 5wt% ( $w_0 = 494$ ) AOT. Here polarizers are crossed at  $90^\circ$ .

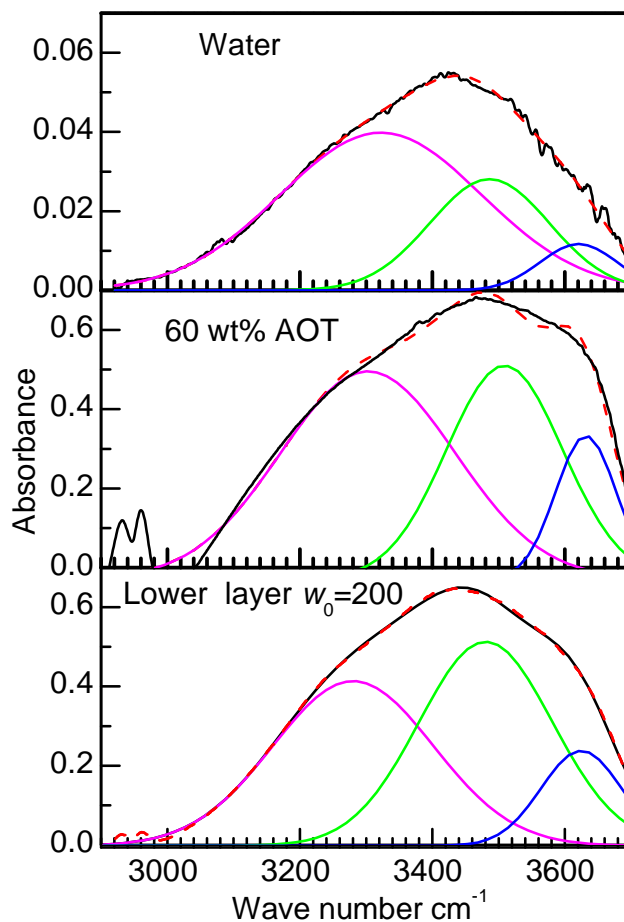

**Figure S7.** Comparison of the OH stretching mode (solid black line) of bulk water, 60 wt% ( $w_0 = 41$ ) AOT and the lower layer of the microemulsion at  $w_0=200$ . Here the fitted data (red dashed line) is obtained by the addition of three single Gaussian functions for NW (magenta line), IW (green line), MW (blue line).
